# Supplementary material for: A comprehensive analysis of the fatal toxic effects associated with CD19 CAR-T cell therapy
Source: PubMed Central journal article supplement (PMC7585129; doi:10.18632/aging.104058), 2020-09-24
Supplement: aging-12-104058-s001.pdf [file aging-12-104058-s001.pdf]

SUPPLEMENTARY FIGURE

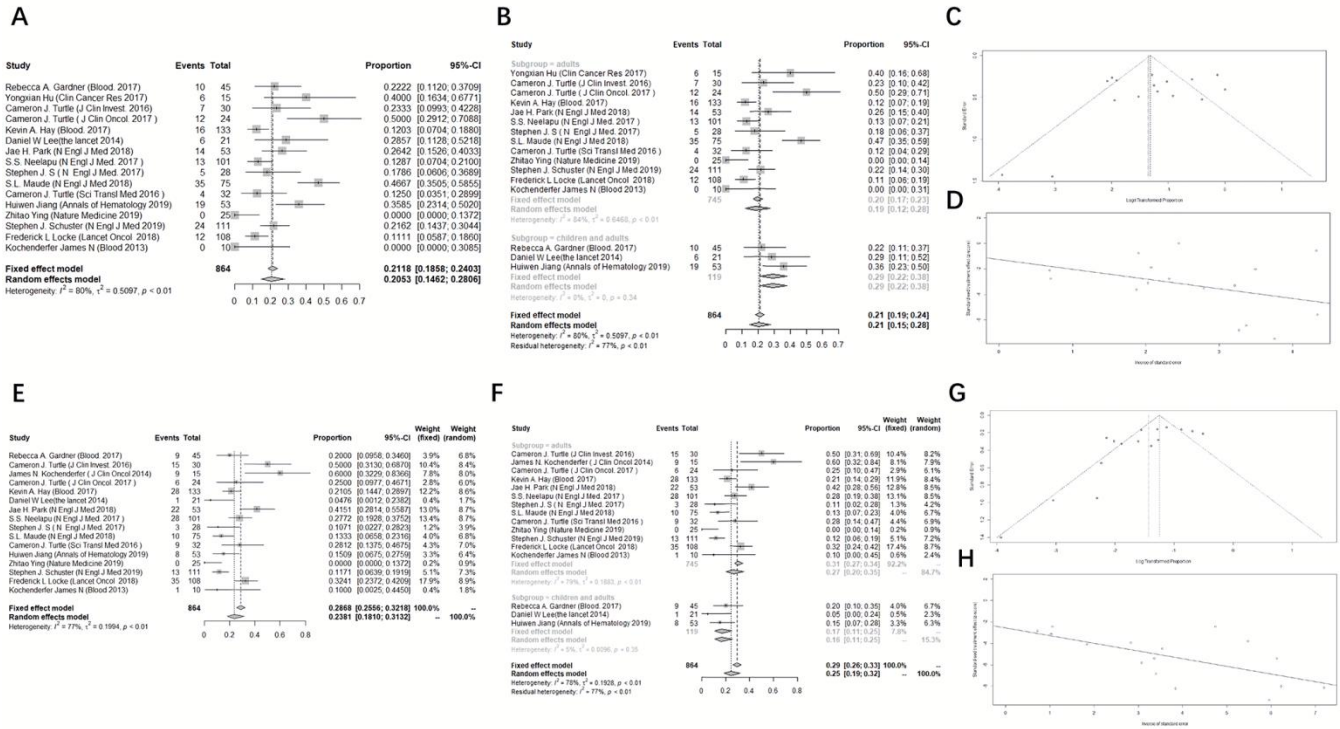

**Supplementary Figure 1. Forest plot of the incidence of CRS and NSD associated with CD19 CAR-T cell therapy.** (A) meta-analysis was performed using R statistical software. Event rates and their corresponding 95% confidence intervals were estimated using both a fixed-effects model and a random-effects model. (A–D) CRS: cytokine release syndrome. (A) Forest plot, (B) subgroup analysis, (C) funnel plot, (D) Egger test, (E–H) NSD: nervous system disorders, (E) forest plot, (F) subgroup analysis, (G) funnel plot, and (H) Egger test.
